# Supplementary material for: Structural and Optoelectronic Properties of Two-Dimensional Ruddlesden–Popper Hybrid Perovskite CsSnBr3
Source: MDPI journal article supplement (doi:10.3390/nano11082119), 2021-08-20
Supplement: s1 [file s1]

# Structural and Optoelectronic Properties of Two-Dimensional Ruddlesden–Popper Hybrid Perovskite $\text{CsSnBr}_3$

Guangbiao Xiang<sup>1</sup>, Yanwen Wu<sup>1</sup>, Yushuang Li<sup>1</sup>, Chen Cheng<sup>1,\*</sup>, Jiancai Leng<sup>2,\*</sup> and Hong Ma<sup>1,\*</sup>

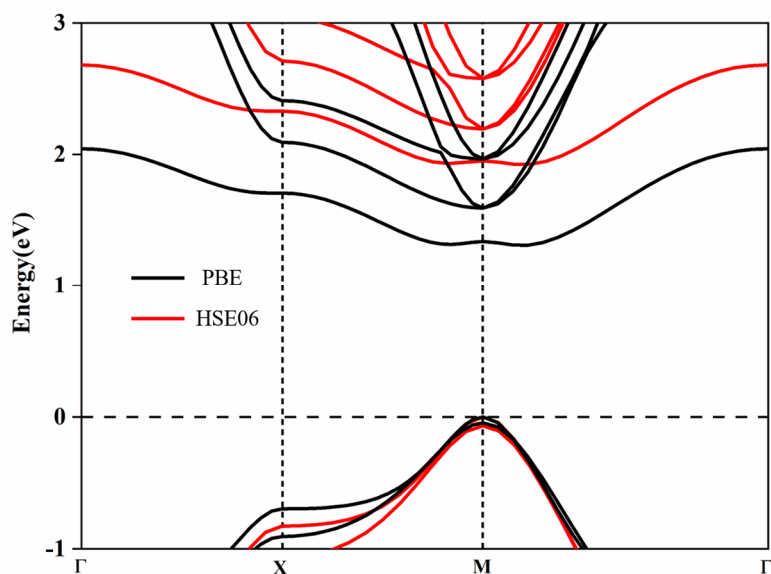

**Figure S1.** band structure of  $\text{Cs}_n\text{Sn}_{n+1}\text{Br}_{3n+2}$  ( $n=1$ ) calculated by PBE (black lines) and HSE06 (red lines) DFT.

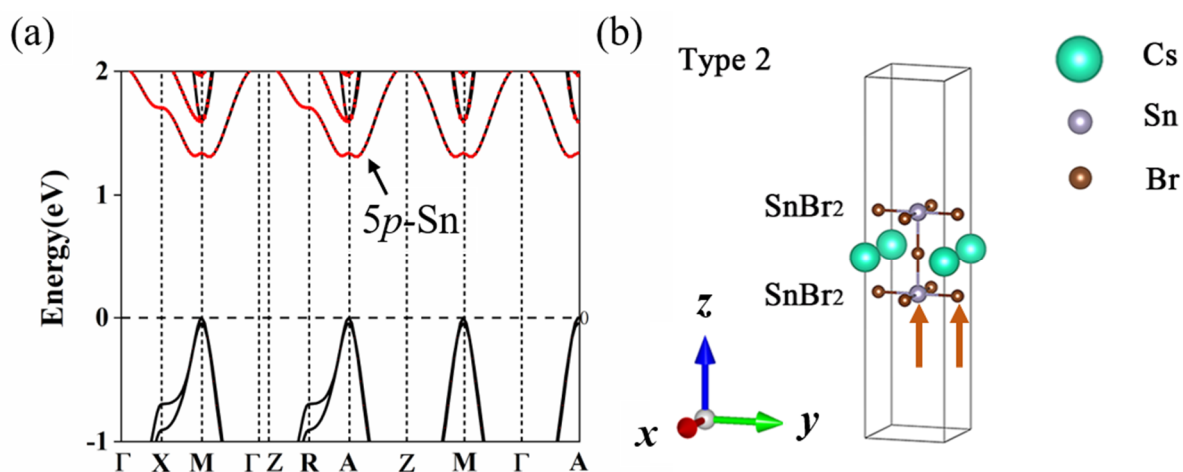

**Figure S2.** (a) Orbital-projected band structure of  $\text{Cs}_n\text{Sn}_{n+1}\text{Br}_{3n+2}$  ( $n = 1$ ). (b) Model of  $\text{Cs}_n\text{Sn}_{n+1}\text{Br}_{3n+2}$  ( $n = 1$ ). The arrow points to the Sn and Br atoms in  $\text{SnBr}_2$ -terminated surface.

**Table S1.** All variables use in this work, including variables name and physical meanings.

| variables       | physical meanings                    | variables       | physical meanings                         |
|-----------------|--------------------------------------|-----------------|-------------------------------------------|
| $a_0$           | lattice constant                     | $P$             | principal value of the integral           |
| $n$             | layers                               | $p$             | momentum transition matrix                |
| $d$             | interplanar distance                 |                 | dielectric function                       |
| $\delta$        | relative displacements               | $\omega$        | frequency of light                        |
| $i$             | layers rumpling                      | $\alpha$        | absorption coefficient                    |
| $\theta$        | angle degree                         | $\hbar$         | reduced Planck Constant                   |
| $V$             | unit volume                          | $e$             | electron charge                           |
| $\varepsilon_1$ | real part of the dielectric function | $\varepsilon_2$ | imaginary part of the dielectric function |
| $kn$            | wave function of the conduction band | $kn'$           | wave function of the valence band         |
